# Supplementary material for: Single-crystalline In2S3nanowire-based flexible visible-light photodetectors with an ultra-high photoresponse
Source: Royal Society of Chemistry journal article supplement (doi:10.1039/c5nr00410a), 2015-01-01
Supplement: c5nr00410a1.pdf [file c5nr00410a1.pdf]

# Single-crystalline $\text{In}_2\text{S}_3$ nanowires based flexible visible-light photodetectors with ultra-high photoresponse

Xuming Xie<sup>a,b</sup> and Guozhen Shen<sup>\*b</sup>

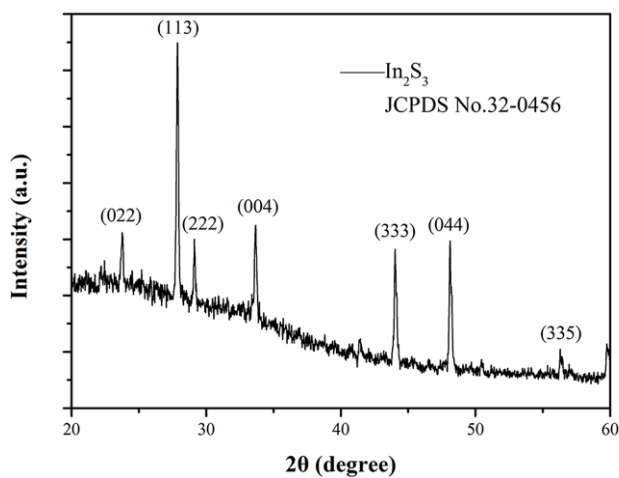

**Figure S1.** XRD pattern of the as-synthesized  $\text{In}_2\text{S}_3$  NWs.

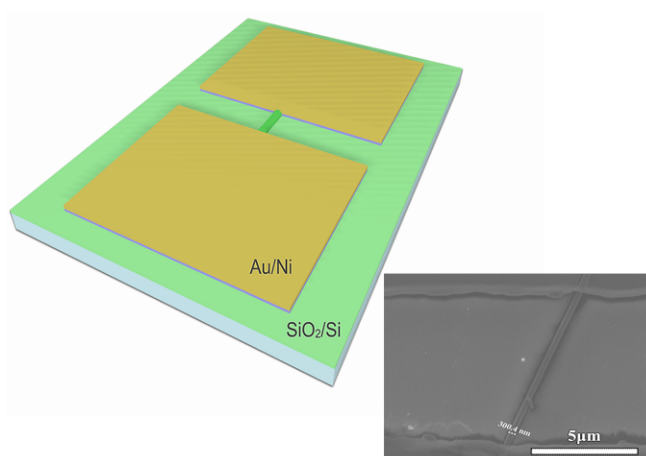

**Figure S2.** Schematic illustration of the single NW back gate FETs and the corresponding SEM image.

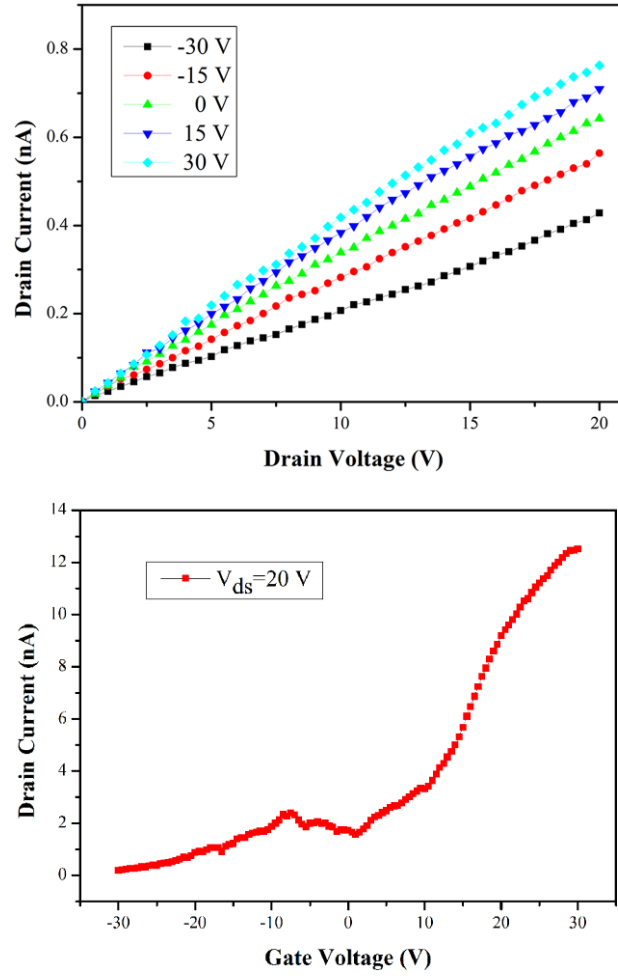

**Figure S3.** (a) Drain current versus drain voltage curves, and (b) Drain current versus gate voltage of the  $\text{In}_2\text{S}_3$  NW FETs.

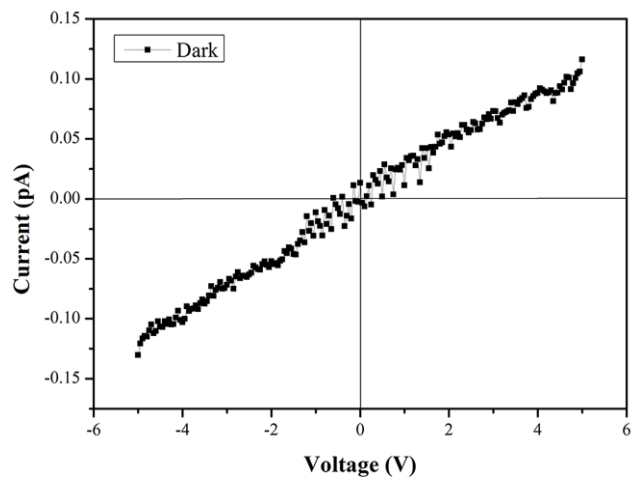

**Figure S4.** I-V curve of the flexible  $\text{In}_2\text{S}_3$  NW photodetector in the dark.
